# Supplementary material for: Changes in Parthenogenetic Imprinting Patterns during Reprogramming by Cell Fusion
Source: PubMed Central journal article supplement (PMC4883797; doi:10.1371/journal.pone.0156491), 2016-05-27
Supplement: pone.0156491.s001.pdf [file pone.0156491.s001.pdf]

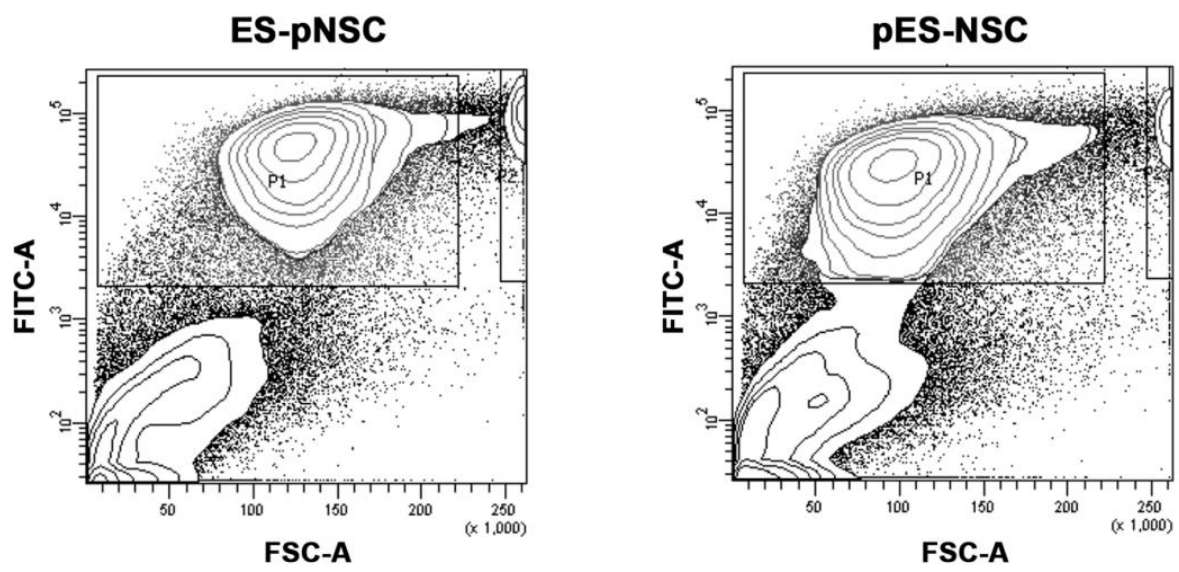

**Fig S1. FACS sorting for Oct4-GFP<sup>+</sup> hybrid cells.** High GFP<sup>+</sup> cells (P1 box) were sorted and further cultured to maintain pure population of reprogrammed fusion hybrid cells.
