# Supplementary material for: Changes in Parthenogenetic Imprinting Patterns during Reprogramming by Cell Fusion
Source: PubMed Central journal article supplement (PMC4883797; doi:10.1371/journal.pone.0156491), 2016-05-27
Supplement: pone.0156491.s002.pdf [file pone.0156491.s002.pdf]

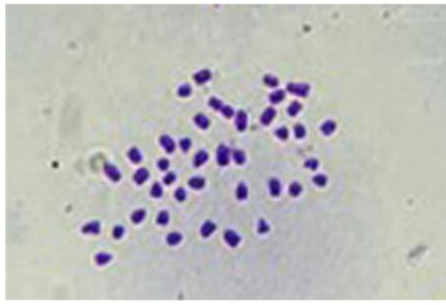

**pESC**

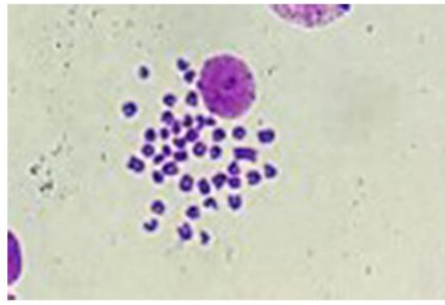

**pNSC**

**Fig. S2. Representative normal diploid karyotypes of parthenogenetic fusion partner cells.** In both case, more than 90% cells examined contained normal 40 chromosomes ( $n=30$ ).
