# Supplementary material for: Changes in Parthenogenetic Imprinting Patterns during Reprogramming by Cell Fusion
Source: PubMed Central journal article supplement (PMC4883797; doi:10.1371/journal.pone.0156491), 2016-05-27
Supplement: pone.0156491.s003.pdf [file pone.0156491.s003.pdf]

## H19

Range 1: 219 to 383 Graphics ▼ Next Match ▲ Previous Match

| Score           | Expect                                                     | Identities    | Gaps      | Strand     |
|-----------------|------------------------------------------------------------|---------------|-----------|------------|
| 298 bits(330)   | 2e-85                                                      | 165/165(100%) | 0/165(0%) | Plus/Minus |
| <b>ESC</b> 759  | AAGBAGACATGCCCTATTCTTGGAGCTCTGCTGAATCAGTTGTGGGGTTTATACGGGG | 818           |           |            |
| <b>pNSC</b> 383 | AAGBAGACATGCCCTATTCTTGGAGCTCTGCTGAATCAGTTGTGGGGTTTATACGGGG | 324           |           |            |
| <b>ESC</b> 819  | AGTTGCCCGGTGGTGGCAGAAAATCGATTGGCCAAACCTAAAGAGCCCGCCACCCCT  | 878           |           |            |
| <b>pNSC</b> 323 | AGTTGCCCGGTGGTGGCAGAAAATCGATTGGCCAAACCTAAAGAGCCCGCCACCCCT  | 264           |           |            |
| <b>ESC</b> 879  | BGTTATTGGAATTCACAAATGGCAATGCTGTGGGTCCACCAAGTTC             | 923           |           |            |
| <b>pNSC</b> 263 | BGTTATTGGAATTCACAAATGGCAATGCTGTGGGTCCACCAAGTTC             | 219           |           |            |

Range 1: 140 to 304 Graphics ▼ Next Match ▲ Previous Match

| Score           | Expect                                                     | Identities    | Gaps      | Strand    |
|-----------------|------------------------------------------------------------|---------------|-----------|-----------|
| 298 bits(330)   | 2e-85                                                      | 165/165(100%) | 0/165(0%) | Plus/Plus |
| <b>pESC</b> 760 | AAGBAGACATGCCCTATTCTTGGAGCTCTGCTGAATCAGTTGTGGGGTTTATACGGGG | 819           |           |           |
| <b>NSC</b> 140  | AAGBAGACATGCCCTATTCTTGGAGCTCTGCTGAATCAGTTGTGGGGTTTATACGGGG | 199           |           |           |
| <b>pESC</b> 820 | AGTTGCCCGGTGGTGGCAGAAAATCGATTGGCCAAACCTAAAGAGCCCGCCACCCCT  | 879           |           |           |
| <b>NSC</b> 200  | AGTTGCCCGGTGGTGGCAGAAAATCGATTGGCCAAACCTAAAGAGCCCGCCACCCCT  | 269           |           |           |
| <b>pESC</b> 880 | BGTTATTGGAATTCACAAATGGCAATGCTGTGGGTCCACCAAGTTC             | 924           |           |           |
| <b>NSC</b> 260  | BGTTATTGGAATTCACAAATGGCAATGCTGTGGGTCCACCAAGTTC             | 304           |           |           |

## Igf2

Range 1: 51 to 233 Graphics ▼ Next Match ▲ Previous Match

| Score           | Expect                                                    | Identities    | Gaps      | Strand     |
|-----------------|-----------------------------------------------------------|---------------|-----------|------------|
| 331 bits(366)   | 3e-95                                                     | 183/183(100%) | 0/183(0%) | Plus/Minus |
| <b>ESC</b> 905  | GAGCTCAAGAGTTCAGAGAGGCAAAAGCTCATGTCCTGATGATGTTTACCACCCAAA | 964           |           |            |
| <b>pNSC</b> 233 | GAGCTCAAGAGTTCAGAGAGGCAAAAGCTCATGTCCTGATGATGTTTACCACCCAAA | 174           |           |            |
| <b>ESC</b> 965  | GACCCCGCCACGAGGAGGCTCTTCCAGCAACCATCAGTGAATCAAAATTA        | 1024          |           |            |
| <b>pNSC</b> 173 | GACCCCGCCACGAGGAGGCTCTTCCAGCAACCATCAGTGAATCAAAATTA        | 114           |           |            |
| <b>ESC</b> 1025 | TGTGGTAATTCGCAATGATGATACCATCACTGTGACCTCCTCTGAGCAGGACAGTT  | 1084          |           |            |
| <b>pNSC</b> 113 | TGTGGTAATTCGCAATGATGATACCATCACTGTGACCTCCTCTGAGCAGGACAGTT  | 54            |           |            |
| <b>ESC</b> 1085 | CCA 1087                                                  |               |           |            |
| <b>pNSC</b> 53  | CCA 51                                                    |               |           |            |

Range 1: 50 to 232 Graphics ▼ Next Match ▲ Previous Match

| Score           | Expect                                                    | Identities    | Gaps      | Strand    |
|-----------------|-----------------------------------------------------------|---------------|-----------|-----------|
| 331 bits(366)   | 4e-95                                                     | 183/183(100%) | 0/183(0%) | Plus/Plus |
| <b>pESC</b> 48  | GAGCTCAAGAGTTCAGAGAGGCAAAAGCTCATGTCCTGATGATGTTTACCACCCAAA | 107           |           |           |
| <b>NSC</b> 232  | GAGCTCAAGAGTTCAGAGAGGCAAAAGCTCATGTCCTGATGATGTTTACCACCCAAA | 173           |           |           |
| <b>pESC</b> 108 | GACCCCGCCACGAGGAGGCTCTTCCAGCAACCATCAGTGAATCAAAATTA        | 167           |           |           |
| <b>NSC</b> 172  | GACCCCGCCACGAGGAGGCTCTTCCAGCAACCATCAGTGAATCAAAATTA        | 113           |           |           |
| <b>pESC</b> 168 | TGTGGTAATTCGCAATGATGATACCATCACTGTGACCTCCTCTGAGCAGGACAGTT  | 227           |           |           |
| <b>NSC</b> 112  | TGTGGTAATTCGCAATGATGATACCATCACTGTGACCTCCTCTGAGCAGGACAGTT  | 53            |           |           |
| <b>pESC</b> 228 | CCA 230                                                   |               |           |           |
| <b>NSC</b> 52   | CCA 50                                                    |               |           |           |

## Peg1

Range 1: 119 to 315 Graphics ▼ Next Match ▲ Previous Match

| Score           | Expect                                                      | Identities    | Gaps      | Strand    |
|-----------------|-------------------------------------------------------------|---------------|-----------|-----------|
| 356 bits(394)   | 9e-103                                                      | 197/197(100%) | 0/197(0%) | Plus/Plus |
| <b>ESC</b> 118  | GACATGACAGAAAATTTCTGAAATCAAAAAGAAAATGTAAAAAGTGCACCCCTCGAT   | 177           |           |           |
| <b>pNSC</b> 119 | GACATGACAGAAAATTTCTGAAATCAAAAAGAAAATGTAAAAAGTGCACCCCTCGAT   | 178           |           |           |
| <b>ESC</b> 178  | CCCTCAATCACTTCAAACTCTGTGCATGCGCTGCGAGAGGCTCCACACAAGCATTTGTT | 237           |           |           |
| <b>pNSC</b> 179 | CCCTCAATCACTTCAAACTCTGTGCATGCGCTGCGAGAGGCTCCACACAAGCATTTGTT | 238           |           |           |
| <b>ESC</b> 238  | CCTGCGGTCCCGAAGAGTATACCCGAGAGGCAATACGTTTCTGATGACCCCTCTCTC   | 287           |           |           |
| <b>pNSC</b> 239 | CCTGCGGTCCCGAAGAGTATACCCGAGAGGCAATACGTTTCTGATGACCCCTCTCTC   | 298           |           |           |
| <b>ESC</b> 298  | AGGTGCTGGCAATTTCA 314                                       |               |           |           |
| <b>pNSC</b> 299 | AGGTGCTGGCAATTTCA 315                                       |               |           |           |

Range 1: 119 to 315 Graphics ▼ Next Match ▲ Previous Match

| Score           | Expect                                                      | Identities    | Gaps      | Strand    |
|-----------------|-------------------------------------------------------------|---------------|-----------|-----------|
| 356 bits(394)   | 1e-102                                                      | 197/197(100%) | 0/197(0%) | Plus/Plus |
| <b>pESC</b> 779 | GACATGACAGAAAATTTCTGAAATCAAAAAGAAAATGTAAAAAGTGCACCCCTCGAT   | 838           |           |           |
| <b>NSC</b> 119  | GACATGACAGAAAATTTCTGAAATCAAAAAGAAAATGTAAAAAGTGCACCCCTCGAT   | 178           |           |           |
| <b>pESC</b> 839 | CCCTCAATCACTTCAAACTCTGTGCATGCGCTGCGAGAGGCTCCACACAAGCATTTGTT | 898           |           |           |
| <b>NSC</b> 179  | CCCTCAATCACTTCAAACTCTGTGCATGCGCTGCGAGAGGCTCCACACAAGCATTTGTT | 238           |           |           |
| <b>pESC</b> 899 | CCTGCGGTCCCGAAGAGTATACCCGAGAGGCAATACGTTTCTGATGACCCCTCTCTC   | 958           |           |           |
| <b>NSC</b> 239  | CCTGCGGTCCCGAAGAGTATACCCGAGAGGCAATACGTTTCTGATGACCCCTCTCTC   | 298           |           |           |
| <b>pESC</b> 959 | AGGTGCTGGCAATTTCA 975                                       |               |           |           |
| <b>NSC</b> 299  | AGGTGCTGGCAATTTCA 315                                       |               |           |           |

## Peg3

Range 1: 236 to 395 Graphics ▼ Next Match ▲ Previous Match

| Score           | Expect                                                    | Identities    | Gaps      | Strand     |
|-----------------|-----------------------------------------------------------|---------------|-----------|------------|
| 289 bits(320)   | 9e-83                                                     | 160/160(100%) | 0/160(0%) | Plus/Minus |
| <b>ESC</b> 780  | TGCAGAGACCCCTGACAAAGAGGTTGCCCGAGCCCTTGTCTGACAGCGTGGGAGTCA | 839           |           |            |
| <b>pNSC</b> 395 | TGCAGAGACCCCTGACAAAGAGGTTGCCCGAGCCCTTGTCTGACAGCGTGGGAGTCA | 336           |           |            |
| <b>ESC</b> 840  | GAGTCCGAGGAGACGAGCATCGAGAGGAGAGCGAGAGATGTCCACCCCTGGGCTGGT | 899           |           |            |
| <b>pNSC</b> 335 | GAGTCCGAGGAGACGAGCATCGAGAGGAGAGCGAGAGATGTCCACCCCTGGGCTGGT | 276           |           |            |
| <b>ESC</b> 900  | CGCCCGCGGCGCCCGGTTTCAAGTGTGGGTGCACTAGACTG 939             |               |           |            |
| <b>pNSC</b> 275 | CGCCCGCGGCGCCCGGTTTCAAGTGTGGGTGCACTAGACTG 236             |               |           |            |

Range 1: 236 to 395 Graphics ▼ Next Match ▲ Previous Match

| Score           | Expect                                                    | Identities    | Gaps      | Strand    |
|-----------------|-----------------------------------------------------------|---------------|-----------|-----------|
| 289 bits(320)   | 9e-83                                                     | 160/160(100%) | 0/160(0%) | Plus/Plus |
| <b>pESC</b> 769 | TGCAGAGACCCCTGACAAAGAGGTTGCCCGAGCCCTTGTCTGACAGCGTGGGAGTCA | 820           |           |           |
| <b>NSC</b> 395  | TGCAGAGACCCCTGACAAAGAGGTTGCCCGAGCCCTTGTCTGACAGCGTGGGAGTCA | 336           |           |           |
| <b>pESC</b> 829 | GAGTCCGAGGAGACGAGCATCGAGAGGAGAGCGAGAGATGTCCACCCCTGGGCTGGT | 888           |           |           |
| <b>NSC</b> 335  | GAGTCCGAGGAGACGAGCATCGAGAGGAGAGCGAGAGATGTCCACCCCTGGGCTGGT | 276           |           |           |
| <b>pESC</b> 889 | CGCCCGCGGCGCCCGGTTTCAAGTGTGGGTGCACTAGACTG 928             |               |           |           |
| <b>NSC</b> 275  | CGCCCGCGGCGCCCGGTTTCAAGTGTGGGTGCACTAGACTG 236             |               |           |           |

**Fig. S3. Comparison of DNA sequences between fusion partner cells in H19, Igf2, Peg1, and Peg3 genes.**

The sequences between ESCs and pNSCs and between pESCs and NSCs were 100% identical in H19, Igf2, Peg1, and Peg3 genes. Thus, there was no SNP in these genes between fusion partner cells (between ESCs and pNSCs, and pESCs and NSCs). These analyses were performed using BLAST® program of National Library of Medicine.
